Development 140, 247 (2013) doi:10.1242/dev.091801  
© 2013. Published by The Company of Biologists Ltd

## A dual function for canonical Wnt/ $\beta$ -catenin signaling in the developing mammalian cochlea

**Bonnie E. Jacques<sup>1</sup>, Chandrakala Puligilla<sup>2</sup>, Rachel M. Weichert<sup>1</sup>, Anna Ferrer-Vaquer<sup>3</sup>,  
Anna-Katerina Hadjantonakis<sup>3</sup>, Matthew W. Kelley<sup>2</sup> and Alain Dabdoub<sup>1,4</sup>**

There was an error published in *Development* **139**, 4395-4404.

The following address should have been listed as affiliation 4:

Present address: Department of Otolaryngology – Head and Neck Surgery, Sunnybrook Research Institute, University of Toronto, Toronto, ON, Canada

We apologise to the authors and readers for this mistake.
